# Supplementary material for: Facilitators and Barriers to Implementation of a Childhood Tuberculosis Control Program in Bangladesh: A Mixed-Methods Study from BRAC Urban DOTS Centres in Dhaka
Source: MDPI journal article supplement (doi:10.3390/nursrep12020036), 2022-05-10
Supplement: s1 [file s1]

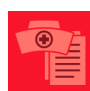

## Supplementary File S1: Questionnaire KAP survey

Questionnaire for Shyastha Shebika for assessment of Knowledge, Awareness, and Practices on Childhood Tuberculosis

### Knowledge, Awareness and Practices survey on Childhood Tuberculosis in Bangladesh

ID Number: \_\_\_\_\_

Date of Interview: \_\_\_\_\_

#### Demographic Information

| S. No. | Question                                                                                                | Response                                                                                            | Code |
|--------|---------------------------------------------------------------------------------------------------------|-----------------------------------------------------------------------------------------------------|------|
| A1     | Age                                                                                                     | ____ years                                                                                          |      |
| A2     | Name of Health Centre                                                                                   |                                                                                                     |      |
| A3     | Level of education                                                                                      | No education<br>Primary School<br>Secondary School<br>Higher Secondary<br>Undergraduate<br>Graduate |      |
| A4     | How long have you been working in the health center?                                                    | ____ years                                                                                          |      |
| A5     | Gender                                                                                                  | 1. Male<br>2. Female                                                                                |      |
| A6     | How many cases of TB did you treat/provide medicine during <b>last 12 months (1 year)</b> ?             | ____ (Number)                                                                                       |      |
| A7     | How many patients of tuberculosis that you treated in the past 1 year had been cured?                   | ____ (Number)                                                                                       |      |
| A8     | How long have you been treating/providing medicines to <b>children</b> with tuberculosis?               | ____ years                                                                                          |      |
| A9     | How many cases of <b>child with TB</b> did you provide medicine during <b>last 12 months (1 year)</b> ? | ____ (Number)                                                                                       |      |
| A10    | How many patients of <b>child TB</b> you treated in the past 1 year had been <b>cured</b> ?             | ____                                                                                                |      |
| A11    | Which of the following children do you provide medicine of TB?                                          |                                                                                                     |      |
| A11.1  | Under 1 year                                                                                            | 1. Yes<br>2. No                                                                                     |      |
| A11.2  | 1year - <5 years                                                                                        | 1. Yes<br>2. No                                                                                     |      |
| A11.3  | 5 years – 14 years                                                                                      | 1. Yes<br>2. No                                                                                     |      |

#### Training

|      |                                                               |                          |  |
|------|---------------------------------------------------------------|--------------------------|--|
| B1   | Have you ever received training on tuberculosis?              | 1. Yes<br>2. No          |  |
| B2.1 | When was the last time you received training on TB?           | ____ years               |  |
| B2.2 | When was the last time when you received training on TB?      | ____ months (if <1 year) |  |
| B3   | Do you think the training was adequate for you to work on TB? | 1. Yes<br>2. No          |  |

|       |                                                                             |                              |
|-------|-----------------------------------------------------------------------------|------------------------------|
|       |                                                                             | 3. Do not Know               |
| B4    | Have you ever received training on childhood tuberculosis?                  | 1. Yes                       |
|       |                                                                             | 2. No                        |
| B5.1  | When was the last time when you received training on Childhood TB?          | _____ years                  |
| B5.2  | When was the last time when you received training on Childhood TB?          | _____ months<br>(if <1 year) |
|       |                                                                             | 1. Yes                       |
| B6    | Have you ever been trained specifically on IPT?                             | 2. No                        |
| B7    | If yes what was the duration of IPT training?                               | _____ days                   |
|       |                                                                             | 1. Yes                       |
| B8    | Was that training on (IPT) childhood TB adequate for your work?             | 2. No                        |
|       |                                                                             | 3. Do not Know               |
|       |                                                                             | 1. every month               |
| B9    | How often are you getting refresher training?                               | 2. Once in 3 months          |
|       |                                                                             | 3. Once in 6 months          |
|       |                                                                             | 4. Once in a year            |
| B10   | What is the duration of the refresher training?                             | _____ day                    |
| B11   | Do you think refresher training is adequate imparting knowledge and skills? | 1. Yes                       |
|       |                                                                             | 2. No                        |
| B12   | What components are being covered during training?                          |                              |
|       |                                                                             | 1. Yes                       |
| B12.1 | Diagnosis                                                                   | 2. No                        |
|       |                                                                             | 3. Do not Know               |
|       |                                                                             | 1. Yes                       |
| B12.2 | Treatment                                                                   | 2. No                        |
|       |                                                                             | 3. Do not Know               |
|       |                                                                             | 1. Yes                       |
| B12.3 | Prevention                                                                  | 2. No                        |
|       |                                                                             | 3. Do not Know               |
|       |                                                                             | 1. Yes                       |
| B12.4 | IPT                                                                         | 2. No                        |
|       |                                                                             | 3. Do not Know               |
|       |                                                                             | 1. Yes                       |
| B12.5 | Counseling                                                                  | 2. No                        |
|       |                                                                             | 3. Do not Know               |
|       |                                                                             | 1. Yes                       |
| B12.6 | Stigma                                                                      | 2. No                        |
|       |                                                                             | 3. Do not Know               |
|       |                                                                             | 1. Yes                       |
| B12.7 | Management/maintaining Stock and Supply of medicine/sputum pot/mask         | 2. No                        |
|       |                                                                             | 3. Do not Know               |

### Knowledge on Tuberculosis

|    |                                                                  |                        |
|----|------------------------------------------------------------------|------------------------|
| C1 | How many sputum samples are necessary for diagnosis?             | _____ (Number)         |
| C2 | How should a sputum sample be stored before laboratory analysis? | 1. At room temperature |

2. Sputum samples cannot be stored – should be sent to the laboratory immediately

3. In the fridge

4. In culture medium

1. Yes

2. No

3. Do not Know

1. after 1 month

2. after 2 months

3. after 3 months

4. after 5 month

1. Repeat the next day

2. Repeat after 1 week

3. Repeat after 1 month

4. At the end of 5 months of treatment

1. Yes

2. No

Does tuberculosis spread from the following routes (Knowledge on route of transmission)

1. Yes

2. No

3. Do not Know

|                           |                                                                                 |                |
|---------------------------|---------------------------------------------------------------------------------|----------------|
|                           |                                                                                 | 2. No          |
|                           |                                                                                 | 3. Do not Know |
|                           |                                                                                 | 1. Yes         |
| C7.9                      | During Childbirth                                                               | 2. No          |
|                           |                                                                                 | 3. Do not Know |
|                           |                                                                                 | 1. Yes         |
| C7.10                     | Through breastfeeding                                                           | 2. No          |
|                           |                                                                                 | 3. Do not Know |
| C8                        | How can we prevent spread of TB? (Knowledge on route of transmission)           |                |
|                           |                                                                                 | 1. Yes         |
| C8.1                      | Covering mouth and nose while coughing or sneezing                              | 2. No          |
|                           |                                                                                 | 3. Do not Know |
|                           |                                                                                 | 1. Yes         |
| C8.2                      | Avoid sharing dishes                                                            | 2. No          |
|                           |                                                                                 | 3. Do not Know |
|                           |                                                                                 | 1. Yes         |
| C8.3                      | Washing hands                                                                   | 2. No          |
|                           |                                                                                 | 3. Do not Know |
|                           |                                                                                 | 1. Yes         |
| C8.4                      | Closing windows at home                                                         | 2. No          |
|                           |                                                                                 | 3. Do not Know |
|                           |                                                                                 | 1. Yes         |
| C8.5                      | Good nutritious foods                                                           | 2. No          |
|                           |                                                                                 | 3. Do not Know |
|                           |                                                                                 | 1. Yes         |
| C8.6                      | Praying                                                                         | 2. No          |
|                           |                                                                                 | 3. Do not Know |
| Knowledge on Childhood TB |                                                                                 |                |
|                           |                                                                                 | 1. Yes         |
| D1                        | Do you think <b>children</b> under 5 years can have tuberculosis?               | 2. No          |
|                           |                                                                                 | 3. Do not Know |
|                           |                                                                                 | 1. Yes         |
| D2                        | Do you think <b>children</b> between 5 years to 14 years can have tuberculosis? | 2. No          |
|                           |                                                                                 | 3. Do not Know |
|                           |                                                                                 | 1. Yes         |
| D3                        | Can any vaccine protect children against tuberculosis?                          | 2. No          |
|                           |                                                                                 | 3. Do not Know |
|                           |                                                                                 | 1. DPT         |
| D4                        | If yes, which vaccine can protect children against tuberculosis?                | 2. Measles     |
|                           |                                                                                 | 3. BCG         |
|                           |                                                                                 | 4. Polio       |
|                           |                                                                                 | 1. Yes         |
| D5                        | Do you think BCG vaccine protect <b>children</b> against Tuberculosis?          | 2. No          |
|                           |                                                                                 | 3. Do not Know |
|                           |                                                                                 | 1. Yes         |
| D6                        | Do you think BCG vaccine protect <b>all children</b> against Tuberculosis?      | 2. No          |

|                                              |                                                                                 |                         |
|----------------------------------------------|---------------------------------------------------------------------------------|-------------------------|
|                                              |                                                                                 | 3. Do not Know          |
|                                              |                                                                                 | 1. At birth             |
|                                              |                                                                                 | 2. At 6 weeks           |
| D7                                           | When is the best time for BCG vaccination?                                      | 3. At 10 months         |
|                                              |                                                                                 | 4. At 14 weeks          |
|                                              |                                                                                 | 5. Other. Specify _____ |
| D8                                           | Is TB diagnosis in children more difficult than in adults?                      | 1. Yes                  |
|                                              |                                                                                 | 2. No                   |
| D9                                           | Is a child with following conditions at higher risk of developing tuberculosis? |                         |
| D9.1                                         | Malnourished Child                                                              | 1. Yes                  |
|                                              |                                                                                 | 2. No                   |
|                                              |                                                                                 | 3. Do not Know          |
| D9.2                                         | Child with any form of TB in family                                             | 1. Yes                  |
|                                              |                                                                                 | 2. No                   |
|                                              |                                                                                 | 3. Do not Know          |
| D9.3                                         | Child with sputum positive TB in family                                         | 1. Yes                  |
|                                              |                                                                                 | 2. No                   |
|                                              |                                                                                 | 3. Do not Know          |
| D9.4                                         | Child with measles in past 3 months                                             | 1. Yes                  |
|                                              |                                                                                 | 2. No                   |
|                                              |                                                                                 | 3. Do not Know          |
| D9.5                                         | Child with recent weight loss                                                   | 1. Yes                  |
|                                              |                                                                                 | 2. No                   |
|                                              |                                                                                 | 3. Do not Know          |
| <b>Knowledge on Symptoms of Childhood TB</b> |                                                                                 |                         |
| D10                                          | Are the following symptoms of Tuberculosis in children                          |                         |
| D10.1                                        | Fever of >2wk                                                                   | 1. Yes                  |
|                                              |                                                                                 | 2. No                   |
|                                              |                                                                                 | 3. Do not Know          |
| D10.2                                        | Loss of appetite                                                                | 1. Yes                  |
|                                              |                                                                                 | 2. No                   |
|                                              |                                                                                 | 3. Do not Know          |
| D10.3                                        | Failure to gain weight                                                          | 1. Yes                  |
|                                              |                                                                                 | 2. No                   |
|                                              |                                                                                 | 3. Do not Know          |
| D10.4                                        | Loss of weight                                                                  | 1. Yes                  |
|                                              |                                                                                 | 2. No                   |
|                                              |                                                                                 | 3. Do not Know          |
| D10.5                                        | Persistent cough (>3 weeks)                                                     | 1. Yes                  |
|                                              |                                                                                 | 2. No                   |
|                                              |                                                                                 | 3. Do not Know          |
| D10.6                                        | Lethargy (less playful child)                                                   | 1. Yes                  |
|                                              |                                                                                 | 2. No                   |
|                                              |                                                                                 | 3. Do not Know          |
| D10.7                                        | Abdominal Pain                                                                  | 1. Yes                  |

|        |                            |                |
|--------|----------------------------|----------------|
|        |                            | 2. No          |
|        |                            | 3. Do not Know |
|        |                            | 1. Yes         |
| D10.8  | Body ache                  | 2. No          |
|        |                            | 3. Do not Know |
|        |                            | 1. Yes         |
| D10.9  | Coughing with blood        | 2. No          |
|        |                            | 3. Do not Know |
|        |                            | 1. Yes         |
| D10.10 | Weakness                   | 2. No          |
|        |                            | 3. Do not Know |
|        |                            | 1. Yes         |
| D10.11 | Throat Pain                | 2. No          |
|        |                            | 3. Do not Know |
|        |                            | 1. Yes         |
| D10.12 | Mass/ Swelling in the neck | 2. No          |
|        |                            | 3. Do not Know |
|        |                            | 1. Yes         |
| D10.13 | Mass/Swelling in the back  | 2. No          |
|        |                            | 3. Do not Know |

### Knowledge on Treatment of Tuberculosis

|      |                                                                                                                    |                |
|------|--------------------------------------------------------------------------------------------------------------------|----------------|
| E1   | Is tuberculosis in children a curable disease?                                                                     | 1. Yes         |
|      |                                                                                                                    | 2. No          |
|      |                                                                                                                    | 3. Do not Know |
| E2   | Is there a difference in duration for treatment of TB in child and in adult?                                       | 1. Yes         |
|      |                                                                                                                    | 2. No          |
|      |                                                                                                                    | 3. Do not Know |
| E3   | How many phases are there in the treatment of TB?                                                                  | _____          |
|      |                                                                                                                    | 2 months       |
| E4   | What is the duration of treatment of pulmonary (lungs) tuberculosis in children?                                   | 6 months       |
|      |                                                                                                                    | 9 months       |
|      |                                                                                                                    | 12 months      |
|      |                                                                                                                    | 1 month        |
| E5   | How long is the intensive phase (first phase) of pulmonary (lungs) tuberculosis in children?                       | 2 months       |
|      |                                                                                                                    | 3 months       |
|      |                                                                                                                    | 4 months       |
| E6   | How many types of drugs are used in the first two months of treatment of tuberculosis (in the intensive phase)?    | _____          |
| E7   | How many types of drugs are used in the remaining period of treatment of tuberculosis (in the continuation phase)? | _____          |
|      |                                                                                                                    | 1. Yes         |
| E8   | Can adult TB drugs be provided to the children?                                                                    | 2. No          |
|      |                                                                                                                    | 3. Do not Know |
| E9   | What are the consequences of incomplete TB treatment (in children)?                                                |                |
| E9.1 | Disease may not be cured                                                                                           | 1. Yes         |
|      |                                                                                                                    | 2. No          |

|      |                                     |                |
|------|-------------------------------------|----------------|
|      |                                     | 3. Do not Know |
|      |                                     | 1. Yes         |
| E9.2 | Disease will worsen                 | 2. No          |
|      |                                     | 3. Do not Know |
|      |                                     | 1. Yes         |
| E9.3 | Further transmission of the disease | 2. No          |
|      |                                     | 3. Do not Know |
|      |                                     | 1. Yes         |
| E9.4 | Relapse of the disease              | 2. No          |
|      |                                     | 3. Do not Know |
|      |                                     | 1. Yes         |
| E9.5 | Child may Develop Resistant TB      | 2. No          |
|      |                                     | 3. Do not Know |
|      |                                     | 1. Yes         |
| E9.6 | Child may die                       | 2. No          |
|      |                                     | 3. Do not Know |

#### Attitudes on Diagnosis and Treatment

|      |                                                                                                           |                |
|------|-----------------------------------------------------------------------------------------------------------|----------------|
| F1   | Finding every new case of tuberculosis is essential for control of the disease                            | 1. Yes         |
|      |                                                                                                           | 2. No          |
|      |                                                                                                           | 3. Do not Know |
|      |                                                                                                           | 1. Yes         |
| F2   | Community engagement is essential for the control of the disease                                          | 2. No          |
|      |                                                                                                           | 3. Do not Know |
|      |                                                                                                           | 1. Yes         |
| F3   | There is a substantial increase in treatment completion rates if direct observed treatment (DOTS) is used | 2. No          |
|      |                                                                                                           | 3. Do not Know |
|      |                                                                                                           | 1. Yes         |
| F4   | Making people with suspected/confirmed pulmonary tuberculosis wear masks at home is acceptable            | 2. No          |
|      |                                                                                                           | 3. Do not Know |
|      |                                                                                                           | 1. Yes         |
| F5   | Teaching cough hygiene to tuberculosis patients is not important                                          | 2. No          |
|      |                                                                                                           | 3. Do not Know |
|      |                                                                                                           | 1. Yes         |
| F6   | Public awareness regarding childhood tuberculosis is not sufficient in your community                     | 2. No          |
|      |                                                                                                           | 3. Do not Know |
|      |                                                                                                           | 1. Yes         |
| F7   | In your community are people aware of services that are available for children with TB                    | 2. No          |
|      |                                                                                                           | 3. Do not Know |
| F8   | How can TB in a child be cured?                                                                           |                |
|      |                                                                                                           | 1. Yes         |
| F8.1 | Herbal Medicines                                                                                          | 2. No          |
|      |                                                                                                           | 3. Do not Know |
|      |                                                                                                           | 1. Yes         |
| F8.2 | Home without specific Treatment                                                                           | 2. No          |
|      |                                                                                                           | 3. Do not Know |
|      |                                                                                                           | 1. Yes         |
| F8.3 | Praying                                                                                                   |                |

- 2. No
- 3. Do not Know
- 1. Yes
- 2. No
- 3. Do not Know
- 1. Yes
- 2. No
- 3. Do not Know

F8.4 Drugs given by informal care provider

F8.5 DOTS

### Practices on Diagnosis and Treatment:

- Daily
- Weekly
- Once in 2 weeks
- Monthly
- Patients come to my home
- I go to patient's house home
- Patients take drug from the DOTS center
- In front of me
- In front of the father of the child
- In front of the mother of the child
- Do not know; I just provide them medicine
- Yes, often
- Yes, but occasionally
- No

G1 How frequently do you provide medicines to a child with TB?

G2 How are the drugs supplied?

G3 How do the patients take the drugs?

G4 Have you ever provided medicine to a child by splitting/crushing an adult tablet?

G5 Do you counsel a TB patient on the following aspects of TB during diagnosis and treatment?

G5.1 TB is a curable disease

G5.2 Duration of treatment

G5.3 Importance of compliance

G5.4 Importance of follow up

G5.5 Side effects

G5.6 Prevention of spread of disease

- 1. Yes
- 2. No
- 3. Do not Know
- 1. Yes
- 2. No
- 3. Do not Know
- 1. Yes
- 2. No
- 3. Do not Know
- 1. Yes
- 2. No
- 3. Do not Know
- 1. Yes
- 2. No
- 3. Do not Know
- 1. Yes

|                            |                                                                                       |                                      |
|----------------------------|---------------------------------------------------------------------------------------|--------------------------------------|
|                            |                                                                                       | 2. No                                |
|                            |                                                                                       | 3. Do not Know                       |
| <b>G6</b>                  | <b>What do you think can prevent patients from missing their treatment?</b>           |                                      |
| G6.1                       | Set up feeding program for medicines                                                  | 1. Yes                               |
|                            |                                                                                       | 2. No                                |
| G6.2                       | Intensifying Health education                                                         | 1. Yes                               |
|                            |                                                                                       | 2. No                                |
| G6.3                       | Admission at health facility                                                          | 1. Yes                               |
|                            |                                                                                       | 2. No                                |
| G6.4                       | Give all medicine to take home                                                        | 1. Yes                               |
|                            |                                                                                       | 2. No                                |
| G6.5                       | Take medicine from you every day                                                      | 1. Yes                               |
|                            |                                                                                       | 2. No                                |
| G7                         | How often do you measure the weight of a child under-5 years of age during treatment? | 1. Once in a week                    |
|                            |                                                                                       | 2. Once in 2 weeks                   |
|                            |                                                                                       | 3. Once in a month                   |
|                            |                                                                                       | 4. Once in 2 months                  |
| G8                         | Do you think is it important to measure the weight during treatment?                  | 1. Yes                               |
|                            |                                                                                       | 2. No                                |
| G9                         | Do you have a National guideline on management of Childhood TB?                       | 1. Yes                               |
|                            |                                                                                       | 2. No                                |
| <b>Knowledge about IPT</b> |                                                                                       |                                      |
| H1                         | In your opinion, do you think that IPT reduces the risk of TB infection in children?  | 1. Yes                               |
|                            |                                                                                       | 2. No                                |
| H2                         | Do you think IPT reduces the risk of Tuberculosis in children for a period?           | 1. Yes                               |
|                            |                                                                                       | 2. No                                |
| <b>H3</b>                  | <b>In your opinion, who is eligible to receive IPT?</b>                               |                                      |
| H3.1                       | All children < 5 yrs of parents with pulmonary TB                                     | 1. Yes                               |
|                            |                                                                                       | 2. No                                |
| H3.2                       | All children < 5 yrs in contact with smear positive TB patient                        | 1. Yes                               |
|                            |                                                                                       | 2. No                                |
| H3.3                       | All Children (5–14) years of parent with pulmonary TB                                 | 1. Yes                               |
|                            |                                                                                       | 2. No                                |
| H3.4                       | All children (5–14) yrs in contact with smear positive TB patient                     | 1. Yes                               |
|                            |                                                                                       | 2. No                                |
| <b>Attitudes on IPT</b>    |                                                                                       |                                      |
| I1                         | What is the duration of protective effect of one cycle of IPT?                        | _____                                |
| I2                         | Is it important to take IPT medicine regularly?                                       | 1. Yes                               |
|                            |                                                                                       | 2. No                                |
| I3                         | How do you ensure whether your patients are taking IPT medicines regularly or not?    | 1. Self-report from caretaker        |
|                            |                                                                                       | 2. Detailed interview with caretaker |
|                            |                                                                                       | 3. Pill counts                       |
|                            |                                                                                       | 4. Pharmacy refill data              |

|     |                                                                                                                 |       |                   |
|-----|-----------------------------------------------------------------------------------------------------------------|-------|-------------------|
|     |                                                                                                                 | 5.    | All above         |
|     |                                                                                                                 | 6.    | None of the above |
| I4  | IPT is helpful in reducing TB burden among Children.                                                            | 1.    | Yes               |
|     |                                                                                                                 | 2.    | No                |
|     |                                                                                                                 | 3.    | Do not Know       |
| I5  | Can children with any TB symptoms (current cough, fever, weight loss or night sweats) can be offered IPT.       | 1.    | Yes               |
|     |                                                                                                                 | 2.    | No                |
|     |                                                                                                                 | 3.    | Do not Know       |
| I6  | IPT should be given to all eligible children irrespective of their age.                                         | 1.    | Yes               |
|     |                                                                                                                 | 2.    | No                |
|     |                                                                                                                 | 3.    | Do not Know       |
| I7  | Children < 1 year of age should be provided with IPT if they have a household contact history with a TB case    | 1.    | Yes               |
|     |                                                                                                                 | 2.    | No                |
|     |                                                                                                                 | 3.    | Do not Know       |
| I8  | Children 1- < 5years of age should be provided with IPT if they have a household contact history with a TB case | 1.    | Yes               |
|     |                                                                                                                 | 2.    | No                |
|     |                                                                                                                 | 3.    | Do not Know       |
| I9  | Children 5–14 year of age should be provided with IPT if they have a household contact history with a TB case.  | 1.    | Yes               |
|     |                                                                                                                 | 2.    | No                |
|     |                                                                                                                 | 3.    | Do not Know       |
| I10 | History of TB (>2 years) is not a contraindication for IPT provision                                            | 1.    | Yes               |
|     |                                                                                                                 | 2.    | No                |
|     |                                                                                                                 | 3.    | Do not Know       |
| I11 | Do you use any TB screening guideline to identify children eligible for IPT?                                    | 1.    | Yes, always       |
|     |                                                                                                                 | 2.    | Yes, sometimes    |
|     |                                                                                                                 | 3.    | No                |
| I12 | Do you encourage parents of the children to start IPT once they are eligible?                                   | 1.    | Yes, always       |
|     |                                                                                                                 | 2.    | Yes, sometimes    |
|     |                                                                                                                 | 3.    | No                |
| I13 | Do you provide IPT for eligible child patients? (If no go to Q I17)                                             | 1.    | Yes, always       |
|     |                                                                                                                 | 2.    | Yes, sometimes    |
|     |                                                                                                                 | 3.    | No (              |
| I14 | If your answer for Q13 is 'Yes', how many of them started IPT in the last one year?                             | _____ |                   |
|     |                                                                                                                 | 1.    | Daily             |
| I15 | If you are providing IPT for your patients, how frequent do you supply the drugs?                               | 2.    | Weekly            |
|     |                                                                                                                 | 3.    | Once in 2 weeks   |
|     |                                                                                                                 | 4.    | Once in a month   |
|     |                                                                                                                 | 1.    | Yes, always       |
| I16 | Do you advise clients to take medicines (IPT) regularly?                                                        | 2.    | Yes, sometimes    |
|     |                                                                                                                 | 3.    | No                |
|     |                                                                                                                 | 1.    | Yes, always       |
| I17 | Do you monitor and manage clients with IPT side effects?                                                        | 2.    | Yes, sometimes    |
|     |                                                                                                                 | 3.    | No                |
| I18 |                                                                                                                 | 1.    | Yes               |

- Is it necessary to provide IPT to children every time they are exposed to a TB patient at home/close contact?
2. No
  3. Do not Know

### Knowledge on Human Resources Management

- J1 Are you being regularly supervised by your immediate supervisor/manager for your works?
1. Yes
  2. No
- J2 How often the supervision happens?
- Monthly
  - Once in 3 months
  - Once in 6 months
  - Once in a year
  - Last week
- J3 When was the last time you have been supervised by your supervisor?
- 2 weeks ago
  - 3 weeks ago
  - Last month
- J4 Did your last supervision visit include drug management (patient card checked; drug card checked etc.)?
1. Yes
  2. No
- J5 Does your immediate supervisor/manager provide feedback on your works/reports?
1. Yes
  2. No

### Attitudes on Human Resource Management

- K1 The contents of the training programs organized are always relevant to the changing needs of our job
1. Yes
  2. No
  3. Do not Know
- K2 I am being paid adequately for the work I do
1. Yes
  2. No
  3. Do not Know
- K3 Incentive plans do not motivate me for better performance.
1. Yes
  2. No
  3. Do not Know
- K4 I receive proper feedback on how I am performing
1. Yes
  2. No
  3. Do not Know
- K5 My supervisor encourages me to discuss my problems with him/her
1. Yes
  2. No
  3. Do not Know
- K6 Adequate training regarding childhood TB facilitates TB management
1. Yes
  2. No
  3. Do not Know
- K7 Regular supervision/proper guidance helps to improve performance
1. Yes
  2. No
  3. Do not Know
- K8 Availability of required facilities (drugs, sputum cup, face mask etc) improves quality of work
1. Yes
  2. No
  3. Do not Know
- K9 Good working relations with supervisor helps to improve performance
1. Yes
  2. No
  3. Do not Know
- K10 Financial incentives motivate me to work
1. Yes

|     |                                                                                                                      |    |             |
|-----|----------------------------------------------------------------------------------------------------------------------|----|-------------|
|     |                                                                                                                      | 2. | No          |
|     |                                                                                                                      | 3. | Do not Know |
|     |                                                                                                                      | 1. | Yes         |
| K11 | Frequency of refresher training is adequate                                                                          | 2. | No          |
|     |                                                                                                                      | 3. | Do not Know |
|     |                                                                                                                      | 1. | Yes         |
| K12 | Enough IEC materials for health education are available                                                              | 2. | No          |
|     |                                                                                                                      | 3. | Do not Know |
|     |                                                                                                                      | 1. | Yes         |
| K13 | Frequency of supervision is adequate                                                                                 | 2. | No          |
|     |                                                                                                                      | 3. | Do not Know |
|     |                                                                                                                      | 1. | Yes         |
| K14 | I have got required communications skills to talk about the TB in children for public?                               | 2. | No          |
|     |                                                                                                                      | 3. | Do not Know |
|     |                                                                                                                      | 1. | Yes         |
| K15 | I have got skills to collect sputum from children with suspected TB                                                  | 2. | No          |
|     |                                                                                                                      | 3. | Do not Know |
|     |                                                                                                                      | 1. | Yes         |
| K16 | Do you have Handbooks on TB in children for health education?                                                        | 2. | No          |
|     |                                                                                                                      | 1. | Yes         |
| K17 | Do you have any IEC materials (posters, pamphlets, flipchart, leaflets etc.) on TB in children for health education? | 2. | No          |
|     |                                                                                                                      | 1. | Yes         |
| K18 | Do you have regular monthly meeting with supervisor?                                                                 | 2. | No          |

### Supply Chain Management

|    |                                                                                                                                          |                                         |     |
|----|------------------------------------------------------------------------------------------------------------------------------------------|-----------------------------------------|-----|
| L1 | In the past 3 months did you faced any interruption in DOTS services?                                                                    | 1.                                      | Yes |
|    |                                                                                                                                          | 2.                                      | No  |
| L2 | In the past 3 months did you faced any interruption in supply of anti-TB drugs?                                                          | 1.                                      | Yes |
|    |                                                                                                                                          | 2.                                      | No  |
| L3 | In the past 3 months did you faced any interruption in supply of pediatric/childhood anti-TB drugs?                                      | 1.                                      | Yes |
|    |                                                                                                                                          | 2.                                      | No  |
| L4 | In the past 3 months did you faced any interruption in supply of infection control equipments (gloves, aprons, gowns, caps, masks etc.)? | 1.                                      | Yes |
|    |                                                                                                                                          | 2.                                      | No  |
| L5 | In the past 3 months did you faced any interruption in supply of sputum collection pot?                                                  | 1.                                      | Yes |
|    |                                                                                                                                          | 2.                                      | No  |
| L6 | Do you have any IEC materials on TB in children for health education sufficient for 1 month?                                             | 1.                                      | Yes |
|    |                                                                                                                                          | 2.                                      | No  |
| L7 | Do you know how to complete the patient card/patient information sheet/drug card?                                                        | 1.                                      | Yes |
|    |                                                                                                                                          | 2.                                      | No  |
| L8 | How did you learn to complete the patient card/patient information sheet/drug card?                                                      | During a training on tuberculosis       |     |
|    |                                                                                                                                          | On-the-job training from supervisor     |     |
|    |                                                                                                                                          | Informal learning from other colleagues |     |
|    |                                                                                                                                          | Self-learning                           |     |

|     |                                                                                                                                           |                          |   |
|-----|-------------------------------------------------------------------------------------------------------------------------------------------|--------------------------|---|
| L9  | How many emergency orders for DOTS service (e.g. anti-TB drugs, infection control accessories etc.) have you placed in the last 3 months? | Never been trained       |   |
|     |                                                                                                                                           | None                     | 1 |
|     |                                                                                                                                           |                          | 2 |
|     |                                                                                                                                           |                          | 3 |
| L10 | How many emergency orders for childhood anti-TB drugs for DOTS service have you placed in the last 3 months?                              | More than 3              |   |
|     |                                                                                                                                           | None                     | 1 |
|     |                                                                                                                                           |                          | 2 |
|     |                                                                                                                                           |                          | 3 |
| L11 | How many emergency orders of supplies (sputum collection pots, masks etc.) have you placed in the last 3 months?                          | More than 3              |   |
|     |                                                                                                                                           | None                     | 1 |
|     |                                                                                                                                           |                          | 2 |
|     |                                                                                                                                           |                          | 3 |
| L12 | How do you calculate the quantities of anti-TB drugs?                                                                                     | More than 3              |   |
|     |                                                                                                                                           | Number of TB cases       |   |
|     |                                                                                                                                           | Any formula              |   |
|     |                                                                                                                                           | Don't know               |   |
| L13 | How do you get the products (anti-TB drugs, sputum collection pot, mask etc.)?                                                            | Program officer delivers |   |
|     |                                                                                                                                           | Field organizer delivers |   |
|     |                                                                                                                                           | I collect myself         |   |
|     |                                                                                                                                           | Other _____              |   |
| L14 | On average, approximately how long does it take between ordering and receiving products?                                                  | On the same day          |   |
|     |                                                                                                                                           | Less than one week       |   |
|     |                                                                                                                                           | Less than two weeks      |   |
|     |                                                                                                                                           | Less than one month      |   |
|     |                                                                                                                                           | More than one month      |   |
|     |                                                                                                                                           | More than two month      |   |

**Supplementary File S2: Standards for Reporting Implementation Studies: the StaRI checklist for completion**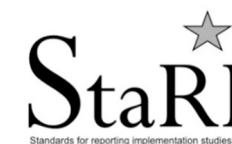

The StaRI standard should be referenced as:

Pinnock H, Barwick M, Carpenter C, Eldridge S, Grandes G, Griffiths CJ, Rycroft-Malone J, Meissner P, Murray E, Patel A, Sheikh A, Taylor SJ for the StaRI Group. Standards for Reporting Implementation Studies ([StaRI](#)) statement. *BMJ* 2017;356:i6795

The detailed Explanation and Elaboration document, which provides the rationale and exemplar text for all these items is:

Pinnock H, Barwick M, Carpenter C, Eldridge S, Grandes G, Griffiths C, Rycroft-Malone J, Meissner P, Murray E, Patel A, Sheikh A, Taylor S, for the StaRI group. Standards for Reporting Implementation Studies ([StaRI](#)). *Explanation and Elaboration document*. *BMJ Open* 2017;7:e013318

Notes: A key concept of the StaRI standards is the dual strands of describing, on the one hand, the implementation strategy and, on the other, the clinical, healthcare, or public health intervention that is being implemented. These strands are represented as two columns in the checklist.

The primary focus of implementation science is the implementation strategy (column 1) and the expectation is that this will always be completed.

The evidence about the impact of the intervention on the targeted population should always be considered (column 2) and either health outcomes reported or robust evidence cited to support a known beneficial effect of the intervention on the health of individuals or populations.

The StaRI standards refers to the broad range of study designs employed in implementation science. Authors should refer to other reporting standards for advice on reporting specific methodological features. Conversely, whilst all items are worthy of consideration, not all items will be applicable to, or feasible within every study.

| Checklist item            | Reported on page #                                                                  | Implementation Strategy                                                                                    | Reported on page #                                                                    | Intervention                                                                                     |
|---------------------------|-------------------------------------------------------------------------------------|------------------------------------------------------------------------------------------------------------|---------------------------------------------------------------------------------------|--------------------------------------------------------------------------------------------------|
|                           |  | "Implementation strategy" refers to how the intervention was implemented                                   |  | "Intervention" refers to the healthcare or public health intervention that is being implemented. |
| <b>Title and abstract</b> |                                                                                     |                                                                                                            |                                                                                       |                                                                                                  |
| Title                     | 1                                                                                   | Identification as an implementation study, and description of the methodology in the title and/or keywords |                                                                                       |                                                                                                  |

|                      |    |     |                                                                                                                                                                                                                             |     |                                                                                                                                                                            |
|----------------------|----|-----|-----------------------------------------------------------------------------------------------------------------------------------------------------------------------------------------------------------------------------|-----|----------------------------------------------------------------------------------------------------------------------------------------------------------------------------|
|                      |    | 2   |                                                                                                                                                                                                                             |     |                                                                                                                                                                            |
| Abstract             | 2  | 2–3 | Identification as an implementation study, including a description of the implementation strategy to be tested, the evidence-based intervention being implemented, and defining the key implementation and health outcomes. |     |                                                                                                                                                                            |
| Introduction         |    |     |                                                                                                                                                                                                                             |     |                                                                                                                                                                            |
| Introduction         | 3  | 2–3 | Description of the problem, challenge or deficiency in healthcare or public health that the intervention being implemented aims to address.                                                                                 |     |                                                                                                                                                                            |
| Rationale            | 4  | 2–4 | The scientific background and rationale for the implementation strategy (including any underpinning theory/framework/model, how it is expected to achieve its effects and any pilot work).                                  |     | The scientific background and rationale for the intervention being implemented (including evidence about its effectiveness and how it is expected to achieve its effects). |
| Aims and objectives  | 5  | 2–3 | The aims of the study, differentiating between implementation objectives and any intervention objectives.                                                                                                                   |     |                                                                                                                                                                            |
| Methods: description |    |     |                                                                                                                                                                                                                             |     |                                                                                                                                                                            |
| Design               | 6  | 3–4 | The design and key features of the evaluation, (cross referencing to any appropriate methodology reporting standards) and any changes to study protocol, with reasons                                                       |     |                                                                                                                                                                            |
| Context              | 7  | 2–4 | The context in which the intervention was implemented. (Consider social, economic, policy, healthcare, organisational barriers and facilitators that might influence implementation elsewhere).                             |     |                                                                                                                                                                            |
| Targeted ‘sites’     | 8  | 3–4 | The characteristics of the targeted ‘site(s)’ (e.g locations/personnel/resources etc.) for implementation and any eligibility criteria.                                                                                     | 3–4 | The population targeted by the intervention and any eligibility criteria.                                                                                                  |
| Description          | 9  | 5–6 | A description of the implementation strategy                                                                                                                                                                                | 5–6 | A description of the intervention                                                                                                                                          |
| Sub-groups           | 10 | N/A | Any sub-groups recruited for additional research tasks, and/or nested studies are described                                                                                                                                 |     |                                                                                                                                                                            |
| Methods: evaluation  |    |     |                                                                                                                                                                                                                             |     |                                                                                                                                                                            |

|                     |    |      |                                                                                                                                                                                                  |     |                                                                                                                                                       |
|---------------------|----|------|--------------------------------------------------------------------------------------------------------------------------------------------------------------------------------------------------|-----|-------------------------------------------------------------------------------------------------------------------------------------------------------|
| Outcomes            | 11 | N/A  | Defined pre-specified primary and other outcome(s) of the implementation strategy, and how they were assessed. Document any pre-determined targets                                               | N/A | Defined pre-specified primary and other outcome(s) of the intervention (if assessed), and how they were assessed. Document any pre-determined targets |
| Process evaluation  | 12 | 5–8  | Process evaluation objectives and outcomes related to the mechanism by which the strategy is expected to work                                                                                    |     |                                                                                                                                                       |
| Economic evaluation | 13 | N/A  | Methods for resource use, costs, economic outcomes and analysis for the implementation strategy                                                                                                  | N/A | Methods for resource use, costs, economic outcomes and analysis for the intervention                                                                  |
| Sample size         | 14 | 3–4  | Rationale for sample sizes (including sample size calculations, budgetary constraints, practical considerations, data saturation, as appropriate)                                                |     |                                                                                                                                                       |
| Analysis            | 15 | 4–5  | Methods of analysis (with reasons for that choice)                                                                                                                                               |     |                                                                                                                                                       |
| Sub-group analyses  | 16 | N/A  | Any a priori sub-group analyses (e.g. between different sites in a multicentre study, different clinical or demographic populations), and sub-groups recruited to specific nested research tasks |     |                                                                                                                                                       |
| Results             |    |      |                                                                                                                                                                                                  |     |                                                                                                                                                       |
| Characteristics     | 17 | 5–6  | Proportion recruited and characteristics of the recipient population for the implementation strategy                                                                                             |     | Proportion recruited and characteristics (if appropriate) of the recipient population for the intervention                                            |
| Outcomes            | 18 | 6–10 | Primary and other outcome(s) of the implementation strategy                                                                                                                                      |     | Primary and other outcome(s) of the Intervention (if assessed)                                                                                        |
| Process outcomes    | 19 | N/A  | Process data related to the implementation strategy mapped to the mechanism by which the strategy is expected to work                                                                            |     |                                                                                                                                                       |
| Economic evaluation | 20 | N/A  | Resource use, costs, economic outcomes and analysis for the implementation strategy                                                                                                              |     | Resource use, costs, economic outcomes and analysis for the intervention                                                                              |
| Sub-group analyses  | 21 | N/A  | Representativeness and outcomes of subgroups including those recruited to specific research tasks                                                                                                |     |                                                                                                                                                       |

|                       |    |      |                                                                                                                                                                                                                                           |    |                                                                                                                         |
|-----------------------|----|------|-------------------------------------------------------------------------------------------------------------------------------------------------------------------------------------------------------------------------------------------|----|-------------------------------------------------------------------------------------------------------------------------|
| Fidelity/ adaptation  | 22 | N/A  | Fidelity to implementation strategy as planned and adaptation to suit context and preferences                                                                                                                                             |    | Fidelity to delivering the core components of intervention (where measured)                                             |
| Contextual changes    | 23 | N/A  | Contextual changes (if any) which may have affected outcomes                                                                                                                                                                              |    |                                                                                                                         |
| Harms                 | 24 | N/A  | All important harms or unintended effects in each group                                                                                                                                                                                   |    |                                                                                                                         |
| Discussion            |    |      |                                                                                                                                                                                                                                           |    |                                                                                                                         |
| Structured discussion | 25 | 7–10 | Summary of findings, strengths and limitations, comparisons with other studies, conclusions and implications                                                                                                                              |    |                                                                                                                         |
| Implications          | 26 | 11   | Discussion of policy, practice and/or research implications of the implementation strategy (specifically including scalability)                                                                                                           | 11 | Discussion of policy, practice and/or research implications of the intervention (specifically including sustainability) |
| General               |    |      |                                                                                                                                                                                                                                           |    |                                                                                                                         |
| Statements            | 27 | 12   | Include statement(s) on regulatory approvals (including, as appropriate, ethical approval, confidential use of routine data, governance approval), trial/study registration (availability of protocol), funding and conflicts of interest |    |                                                                                                                         |

Adapted from Pinnock et al. (2017):

Pinnock, H.; Barwick, M.; Carpenter, C.; Eldridge, S.; Grandes, G.; Griffiths, C.J.; Rycroft-Malone, J.; Meissner, P.; Murray, E.; Patel, A.; et al. Standards for Reporting Implementation Studies (StaRI) Statement. *BMJ* **2017**, *356*, i6795. <https://doi.org/10.1136/bmj.i6795>.

## Supplementary File S3: KAP scores

Mean ( $\pm$  S.E.) and 95% CI of scores on Knowledge, Attitude and Practice of childhood TB

| Traits                                                           | Mean ( $\pm$ S.E.)                 | 95% CI           |
|------------------------------------------------------------------|------------------------------------|------------------|
| <b>Total Knowledge Score (<math>n = 61</math>)</b>               | <b>43.6 (<math>\pm</math> 0.5)</b> | <b>42.6–44.6</b> |
| 1. Knowledge on Tuberculosis ( $n = 22$ )                        | 12 ( $\pm$ 0.2)                    | 11.6–12.40       |
| Knowledge on Transmission of Disease ( $n = 10$ )                | 4.3 ( $\pm$ 0.3)                   | 4.0–4.6          |
| Knowledge on Prevention of Spread of disease ( $n = 6$ )         | 4.0 ( $\pm$ 0.1)                   | 3.8–4.2          |
| 2. Knowledge on Child TB ( $n = 27$ )                            | 22.0 ( $\pm$ 0.3)                  | 21.4–22.6        |
| Knowledge Risk factor for Child TB ( $n = 5$ )                   | 4.3 ( $\pm$ 0.1)                   | 4.2–4.5          |
| Knowledge Symptoms of Child Tuberculosis ( $n = 13$ )            | 11.1 ( $\pm$ 0.2)                  | 10.7–11.5        |
| 3. Knowledge on Treatment of Tuberculosis ( $n = 12$ )           | 9.5 ( $\pm$ 0.1)                   | 9.3–9.7          |
| Technical knowledge ( $n = 6$ )                                  | 3.7 ( $\pm$ 0.2)                   | 3.3–4.1          |
| Knowledge Consequence of Incomplete treatment ( $n = 6$ )        | 5.8 ( $\pm$ 0.1)                   | 5.6–6.0          |
| <b>Attitude on Child Tuberculosis (<math>n = 12</math>)</b>      | <b>10.8 (<math>\pm</math> 0.9)</b> | <b>9–11.6</b>    |
| Attitude on Ways to cure ( $n = 5$ )                             | 4.8 ( $\pm$ 0.05)                  | 4.7–4.9          |
| <b>Practice of Diagnosis and Treatment (<math>n = 16</math>)</b> | <b>13.2 (<math>\pm</math> 0.2)</b> | <b>12.8–13.6</b> |
| Practice on Drug Dispensing ( $n = 5$ )                          |                                    |                  |
| Practice on Counseling ( $n = 6$ )                               | 5.7 ( $\pm$ 0.1)                   | 5.5–5.9          |
| Practice on ensuring compliance ( $n = 5$ )                      | 3.9 ( $\pm$ 0.1)                   | 3.7–4.1          |

## Frequency and percentage distribution of Knowledge, Attitude, and Practice Scores on childhood TB

| Trait                                       | Poor Score            | Average Score         | Good Score            |
|---------------------------------------------|-----------------------|-----------------------|-----------------------|
|                                             | <i>n</i> (percentage) | <i>n</i> (percentage) | <i>n</i> (percentage) |
| Knowledge on Sputum processing              | 7 (6.3)               | 46 (41.4)             | 58 (52.3)             |
| Knowledge on Transmission of TB             | 33 (29.7)             | 73 (65.8)             | 5 (4.5)               |
| Knowledge on Prevention of Spread of TB     | 5 (4.5)               | 68 (61.3)             | 38 (34.2)             |
| Knowledge Risk factor for Child TB          | 5 (4.5)               | 9 (8.1)               | 97 (97.4)             |
| Knowledge Symptom Child TB                  | 0 (0)                 | 25 (22.5)             | 86 (77.5)             |
| Overall Knowledge on Child TB               | 1 (0.9)               | 12 (10.8)             | 98 (88.3)             |
| Knowledge on technical aspects of treatment | 23 (20.7)             | 54 (48.7)             | 34 (30.6)             |
| Consequence of Incomplete treatment         | 0 (0)                 | 3 (2.7)               | 108 (97.3)            |
| Knowledge on Treatment of TB                | 0 (0)                 | 28 (25.2)             | 83 (74.8)             |
| <b>Total Knowledge Score</b>                | <b>0 (0)</b>          | <b>36 (32.4)</b>      | <b>75 (67.6)</b>      |
| <b>Attitude on Child TB</b>                 | <b>0 (0)</b>          | <b>1 (0.9)</b>        | <b>110 (99.1)</b>     |
| Practice on Drug Dispensing                 | 5 (4.5)               | 11 (9.1)              | 95 (85.4)             |
| Practice on Counseling                      | 4 (3.6)               | 0 (0)                 | 107 (96.4)            |
| Practice on ensuring compliance             | 4 (3.6)               | 24 (21.6)             | 83 (74.8)             |
| <b>Practice of Diagnosis and Treatment</b>  | <b>4 (3.6)</b>        | <b>3 (2.7)</b>        | <b>104 (93.7)</b>     |

### Knowledge of Tuberculosis among the Shasthya Shebika

| Traits                                                                 | Average Knowledge | Good Knowledge | p-value |
|------------------------------------------------------------------------|-------------------|----------------|---------|
| <b>Age (n = 111)</b>                                                   |                   |                | 0.519*  |
| < 30 years                                                             | 10                | 0              |         |
| 30–50 years                                                            | 68                | 12             |         |
| >50 years                                                              | 19                | 2              |         |
| <b>Education (n = 111)</b>                                             |                   |                | 0.76    |
| Never Attended                                                         | 21                | 2              |         |
| Primary                                                                | 36                | 5              |         |
| Secondary or above                                                     | 40                | 7              |         |
| <b>Work Duration (n = 111)</b>                                         |                   |                | 0.202*  |
| <5 years                                                               | 11                | 0              |         |
| 5–10 years                                                             | 32                | 3              |         |
| 10 years or more                                                       | 54                | 11             |         |
| <b>Number of tuberculosis patient treated in last 1 year (n = 110)</b> |                   |                | 0.15    |
| less than 10                                                           | 64                | 12             |         |
| 10 or more                                                             | 32                | 2              |         |
| <b>Number of tuberculosis patient cured in last 1 year (n = 108)</b>   |                   |                | 0.213   |
| less than 10                                                           | 74                | 13             |         |
| 10 or more                                                             | 20                | 1              |         |
| <b>Performance of the DOTS center (n = 111)</b>                        |                   |                | 0.914   |
| High Performing Center                                                 | 47                | 7              |         |
| Low performing Center                                                  | 50                | 7              |         |
| <b>Components of training (n = 111)</b>                                |                   |                | 0.636   |
| less than 5                                                            | 11                | 1              |         |
| more than 5                                                            | 86                | 13             |         |

## Knowledge Childhood TB

| Dependent Variables                                                    | Poor Knowledge | Average Knowledge | Good Knowledge | p-value* |
|------------------------------------------------------------------------|----------------|-------------------|----------------|----------|
| <b>Age (n = 111)</b>                                                   |                |                   |                | 0.137    |
| < 30 years                                                             | 1              | 1                 | 8              |          |
| 30–50 years                                                            | 0              | 10                | 70             |          |
| >50 years                                                              | 0              | 1                 | 20             |          |
| <b>Education (n = 111)</b>                                             |                |                   |                | 0.505    |
| Never Attended                                                         | 0              | 1                 | 22             |          |
| Primary                                                                | 0              | 4                 | 37             |          |
| Secondary or above                                                     | 1              | 7                 | 39             |          |
| <b>Work Duration (n = 111)</b>                                         |                |                   |                | 0.887    |
| <5 years                                                               | 0              | 1                 | 10             |          |
| 5–10 years                                                             | 0              | 5                 | 30             |          |
| 10 years or more                                                       | 1              | 6                 | 58             |          |
| <b>Number of tuberculosis patient treated in last 1 year (n = 110)</b> |                |                   |                | 0.54     |
| less than 10                                                           | 1              | 10                | 65             |          |
| 10 or more                                                             | 0              | 2                 | 32             |          |
| <b>Number of tuberculosis patient cured in last 1 year (n = 108)</b>   |                |                   |                | 0.56     |
| less than 10                                                           | 1              | 11                | 75             |          |
| 10 or more                                                             | 0              | 1                 | 20             |          |
| <b>Performance of the DOTS center (n = 111)</b>                        |                |                   |                | 0.55     |
| High Performing Center                                                 | 0              | 7                 | 47             |          |
| Low performing Center                                                  | 1              | 5                 | 51             |          |
| <b>Components of training (n = 111)</b>                                |                |                   |                | 0.219    |
| less than 5                                                            | 0              | 3                 | 9              |          |
| more than 5                                                            | 1              | 9                 | 89             |          |

\* Fischer exact

## Knowledge on Symptoms Child TB

| Traits                                                                        | Average Knowledge | Good Knowledge | p-value |
|-------------------------------------------------------------------------------|-------------------|----------------|---------|
| <b>Age (<i>n</i> = 111)</b>                                                   |                   |                | 0.249*  |
| < 30 years                                                                    | 3                 | 7              |         |
| 30–50 years                                                                   | 20                | 60             |         |
| >50 years                                                                     | 2                 | 19             |         |
| <b>Education (<i>n</i> = 111)</b>                                             |                   |                | 0.191   |
| Never Attended                                                                | 2                 | 21             |         |
| Primary                                                                       | 10                | 31             |         |
| Secondary or above                                                            | 13                | 34             |         |
| <b>Work Duration (<i>n</i> = 111)</b>                                         |                   |                | 0.936   |
| <5 years                                                                      | 2                 | 9              |         |
| 5–10 years                                                                    | 8                 | 27             |         |
| 10 years or more                                                              | 15                | 50             |         |
| <b>Number of tuberculosis patient treated in last 1 year (<i>n</i> = 110)</b> |                   |                | 0.02    |
| less than 10                                                                  | 22                | 54             |         |
| 10 or more                                                                    | 3                 | 31             |         |
| <b>Number of tuberculosis patient cured in last 1 year (<i>n</i> = 108)</b>   |                   |                | 0.09    |
| less than 10                                                                  | 23                | 64             |         |
| 10 or more                                                                    | 2                 | 19             |         |
| <b>Performance of the DOTS center (<i>n</i> = 111)</b>                        |                   |                | 0.703   |
| High Performing Center                                                        | 13                | 41             |         |
| Low performing Center                                                         | 12                | 45             |         |
| <b>Components of training (<i>n</i> = 111)</b>                                |                   |                | 0.342   |
| less than 5                                                                   | 4                 | 8              |         |
| more than 5                                                                   | 21                | 78             |         |
| <b>Duration of treating child tuberculosis patient (<i>n</i> = 40)</b>        |                   |                | 0.175*  |
| <5 years                                                                      | 11                | 14             |         |
| 5–10 years                                                                    | 0                 | 4              |         |
| 10 years or more                                                              | 2                 | 9              |         |

\* Fischer exact

**Total Knowledge Score**

| <b>Traits</b>                                                          | <b>Average Knowledge</b> | <b>Good Knowledge</b> | <b>p-value</b> |
|------------------------------------------------------------------------|--------------------------|-----------------------|----------------|
| <b>Age (n = 111)</b>                                                   |                          |                       | 0.449          |
| < 30 years                                                             | 5                        | 5                     |                |
| 30–50 years                                                            | 25                       | 55                    |                |
| >50 years                                                              | 6                        | 15                    |                |
| <b>Education (n = 111)</b>                                             |                          |                       | 0.964          |
| Never Attended                                                         | 8                        | 15                    |                |
| Primary                                                                | 13                       | 28                    |                |
| Secondary or above                                                     | 15                       | 32                    |                |
| <b>Work Duration (n = 111)</b>                                         |                          |                       | 0.898          |
| <5 years                                                               | 4                        | 7                     |                |
| 5–10 years                                                             | 12                       | 23                    |                |
| 10 years or more                                                       | 20                       | 45                    |                |
| <b>Number of tuberculosis patient treated in last 1 year (n = 110)</b> |                          |                       | 0.212          |
| less than 10                                                           | 27                       | 49                    |                |
| 10 or more                                                             | 8                        | 26                    |                |
| <b>Number of tuberculosis patient cured in last 1 year (n = 108)</b>   |                          |                       | 0.399          |
| less than 10                                                           | 29                       | 58                    |                |
| 10 or more                                                             | 5                        | 16                    |                |
| <b>Performance of the DOTS center (n = 111)</b>                        |                          |                       | 0.546          |
| High Performing Center                                                 | 19                       | 35                    |                |
| Low performing Center                                                  | 17                       | 40                    |                |
| <b>Components of training (n = 111)</b>                                |                          |                       | <b>0.042</b>   |
| less than 5                                                            | 7                        | 5                     |                |
| more than 5                                                            | 29                       | 70                    |                |
| <b>Duration of treating child tuberculosis patient (n = 40)</b>        |                          |                       | 0.506*         |
| <5 years                                                               | 7                        | 18                    |                |
| 5–10 years                                                             | 0                        | 4                     |                |
| 10 years or more                                                       | 4                        | 7                     |                |

\* Fischer Exact test

## Attitude on Diagnosis and Treatment of Child Tuberculosis

| Traits                                                                        | Aver-<br>age | Good | p-value* |
|-------------------------------------------------------------------------------|--------------|------|----------|
| <b>Age (<i>n</i> = 111)</b>                                                   |              |      | 0.822    |
| < 30 years                                                                    | 0            | 10   |          |
| 30–50 years                                                                   | 1            | 79   |          |
| >50 years                                                                     | 0            | 21   |          |
| <b>Education (<i>n</i> = 111)</b>                                             |              |      | 1        |
| Never Attended                                                                | 0            | 23   |          |
| Primary                                                                       | 0            | 41   |          |
| Secondary or above                                                            | 1            | 46   |          |
| <b>Work Duration (<i>n</i> = 111)</b>                                         |              |      | 0.414    |
| <5 years                                                                      | 0            | 11   |          |
| 5–10 years                                                                    | 1            | 34   |          |
| 10 years or more                                                              | 0            | 65   |          |
| <b>Number of tuberculosis patient treated in last 1 year (<i>n</i> = 110)</b> |              |      |          |
| less than 10                                                                  | 0            | 76   |          |
| 10 or more                                                                    | 1            | 33   |          |
| <b>Number of tuberculosis patient cured in last 1 year (<i>n</i> = 108)</b>   |              |      | 0.806    |
| less than 10                                                                  | 1            | 86   |          |
| 10 or more                                                                    | 0            | 21   |          |
| <b>Duration of treatment of Child TB (<i>n</i> = 40)</b>                      |              |      | 1        |
| <5 years                                                                      | 1            | 24   |          |
| 5–10 years                                                                    | 0            | 4    |          |
| 10 years or more                                                              | 0            | 11   |          |
| <b>Performance of the DOTS center (<i>n</i> = 111)</b>                        |              |      | 0.328    |
| High Performing Center                                                        | 0            | 54   |          |
| Low performing Center                                                         | 1            | 56   |          |
| <b>Components of training (<i>n</i> = 111)</b>                                |              |      | 0.108    |
| less than 5                                                                   | 1            | 11   |          |
| more than 5                                                                   | 0            | 99   |          |

\* Fischer exact

## Practice on Diagnosis and Treatment of Child Tuberculosis

| Traits                                                                        | Poor | Average | Good | p-value*     |
|-------------------------------------------------------------------------------|------|---------|------|--------------|
| <b>Age (<i>n</i> = 111)</b>                                                   |      |         |      | 0.585        |
| < 30 years                                                                    | 1    | 0       | 9    |              |
| 30–50 years                                                                   | 2    | 3       | 75   |              |
| >50 years                                                                     | 1    | 0       | 20   |              |
| <b>Work Duration (<i>n</i> = 111)</b>                                         |      |         |      | 0.634        |
| <5 years                                                                      | 1    | 0       | 22   |              |
| 5–10 years                                                                    | 2    | 0       | 39   |              |
| 10 years or more                                                              | 1    | 3       | 43   |              |
| <b>Number of tuberculosis patient treated in last 1 year (<i>n</i> = 110)</b> |      |         |      | 1            |
| less than 10                                                                  | 3    | 2       | 71   |              |
| 10 or more                                                                    | 1    | 1       | 32   |              |
| <b>Number of tuberculosis patient cured in last 1 year (<i>n</i> = 108)</b>   |      |         |      | 0.736        |
| less than 10                                                                  | 3    | 2       | 82   |              |
| 10 or more                                                                    | 0    | 1       | 20   |              |
| <b>Duration of treatment of Child TB (<i>n</i> = 40)</b>                      |      |         |      | <b>0.064</b> |
| <5 years                                                                      | 0    | 0       | 25   |              |
| 5–10 years                                                                    | 0    | 1       | 3    |              |
| 10 years or more                                                              | 1    | 0       | 10   |              |
| <b>Performance of the DOTS center (<i>n</i> = 111)</b>                        |      |         |      | 0.144        |
| High Performing Center                                                        | 0    | 2       | 52   |              |
| Low performing Center                                                         | 4    | 1       | 52   |              |
| <b>Components of training (<i>n</i> = 111)</b>                                |      |         |      | 0.562        |
| less than 5                                                                   | 1    | 0       | 11   |              |
| more than 5                                                                   | 3    | 3       | 93   |              |

\* Fischer exact
